# Supplementary material for: NGFI-A Binding Protein 2 Promotes EGF-Dependent HNSCC Cell Invasion
Source: MDPI journal article supplement (doi:10.3390/cancers11030315), 2019-03-06
Supplement: s1 [file s1]

# Supplementary Materials: NGFI-A Binding Protein 2 Promotes EGF-Dependent HNSCC Cell Invasion

Jinkyung Kim, Sung-Min Kang, Su Young Oh, Heon-Jin Lee, Inhan Lee, Jae Chan Hwang and Su-Hyung Hong

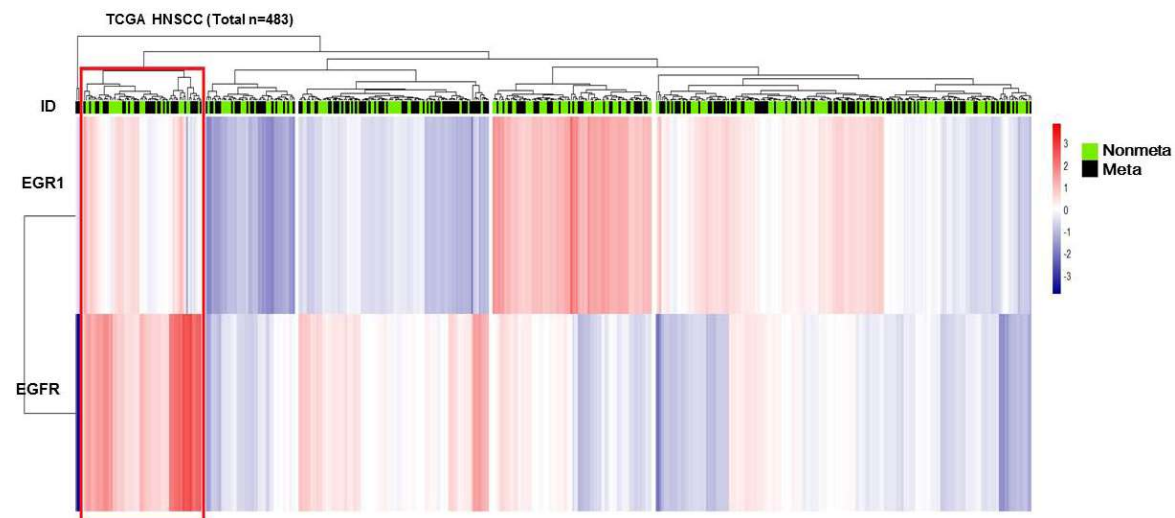

**Figure S1.** Heatmap representation of the relative mRNA expression levels of *EGFR/EGR1* in the TCGA population of head and neck squamous cell carcinoma (HNSCC) specimens. Unsupervised hierarchical clustering with distance measured based on Pearson correlations was performed on log<sub>2</sub>-transformed FPKM-UQ normalized *EGFR/EGR1* mRNA expression data for all patients. Metastatic and non-metastatic patient tumor samples were annotated with green and black bars, respectively.

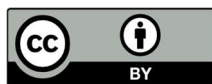

© 2019 by the authors. Licensee MDPI, Basel, Switzerland. This article is an open access article distributed under the terms and conditions of the Creative Commons Attribution (CC BY) license (<http://creativecommons.org/licenses/by/4.0/>).
